# Supplementary material
Source: Springer Nature journal article supplement (https://www.springermedizin.de/resource/supplementary/12889_2012_5054_MOESM2_ESM.pdf/9496572)
Supplement: MOESM2 [file 9496572]

**Regression Results: Drivers of Percentage of Patients Tested Due To Physician Recommendation**

| <b>Variables In Equation</b>                      | <b>Unstandardized Coefficients, B</b> | <b>Std. Error</b> | <b>Standardized Coefficients, Beta</b> | <b>P Value</b> |
|---------------------------------------------------|---------------------------------------|-------------------|----------------------------------------|----------------|
| (Constant)                                        | 0.912                                 | 2.972             | ---                                    | .759           |
| OB/GYN Specialty                                  | 17.435                                | 2.363             | 0.305                                  | .000           |
| Physician aged less than 40                       | 5.028                                 | 2.251             | 0.089                                  | .026           |
| Percent of black patients                         | 0.140                                 | 0.046             | 0.126                                  | .002           |
| Percent of patients on Medicaid                   | 0.263                                 | 0.050             | 0.216                                  | .000           |
| High Comfort Raising Issue with Those NOT at Risk | 5.599                                 | 2.044             | 0.112                                  | .006           |

$R^2=0.23$ ,  $N$  of cases=502

*Notes: The Dependent Variable is Percentage of Patients Tested Due to Physician Recommendation.*

*Independent Variable Definitions Are:*

*Age is a bivariate variable coded 0 if over 40, and coded 1 if < 40*

*Percent of black patients is a scale variable.*

*Percent of Medicaid patients is a scale variable.*

*High Comfort Raising Issue with Those NOT at Risk is a bivariate variable, coded 0 if the respondent gives a score of 1-4 and coded as 1 if the respondent gives a score of 5-7 on a self-rating of comfort, where 0 is “not at all comfortable” and 7 is “extremely comfortable.”*
